# Supplementary figures and images for: RNA Sequencing Reveals That Both Abiotic and Biotic Stress-Responsive Genes Are Induced during Expression of Steroidal Glycoalkaloid in Potato Tuber Subjected to Light Exposure
Source: MDPI journal article supplement (doi:10.3390/genes10110920), 2019-11-11

# Module-sample relationships

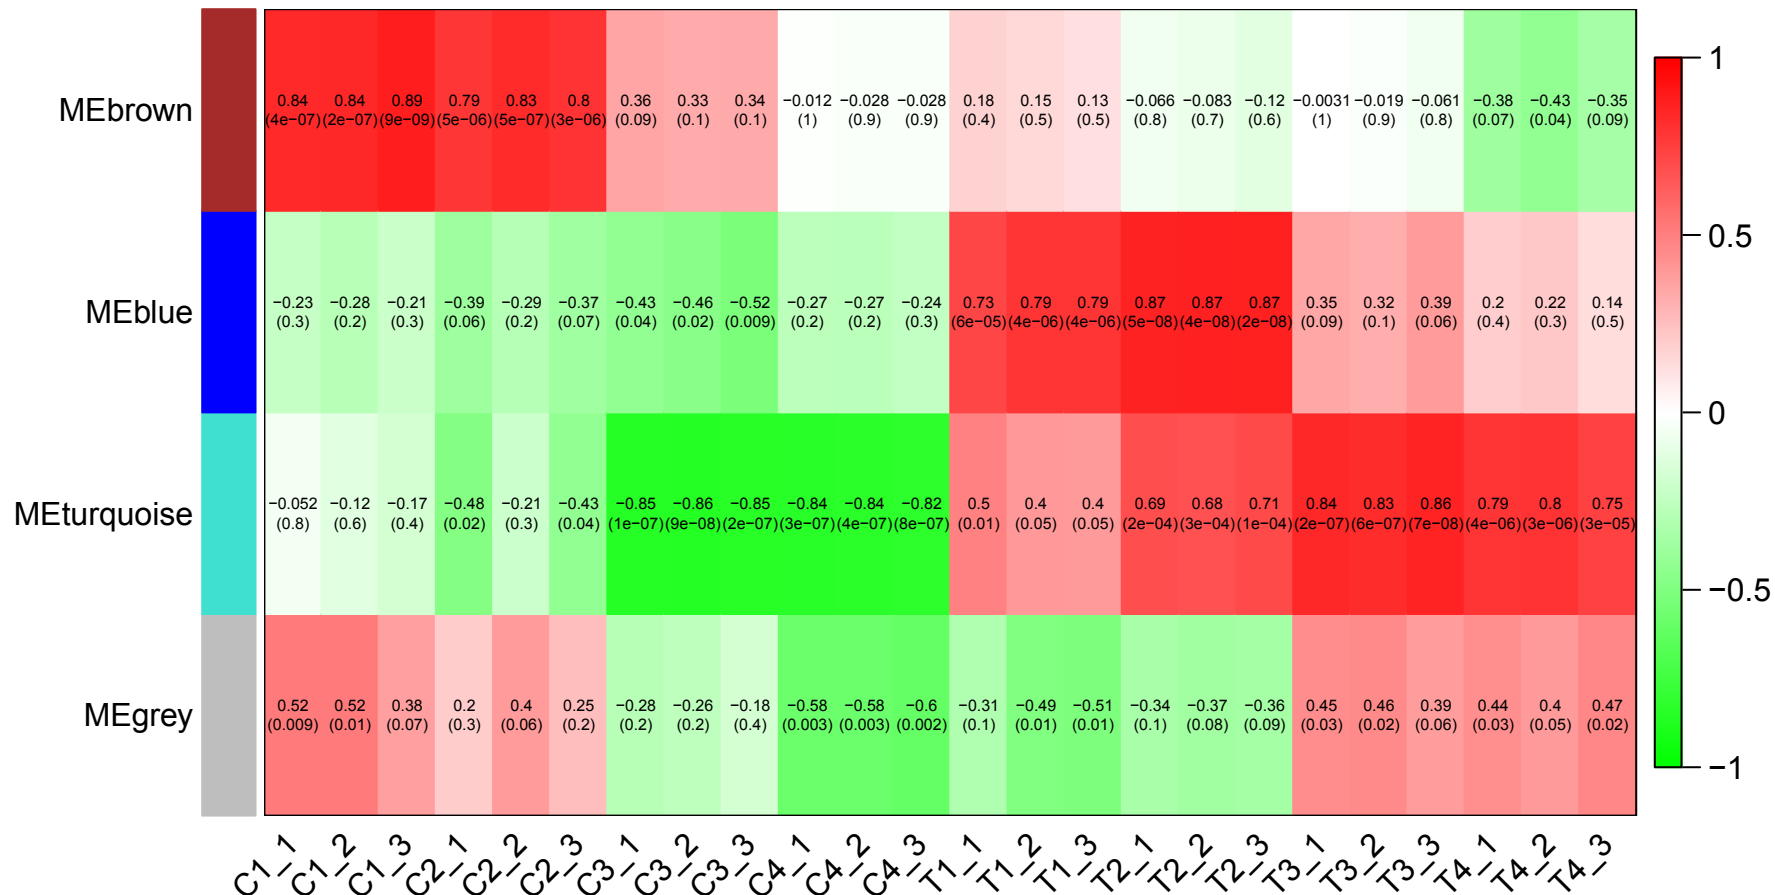

Supplement: s1 [file s1]

Module Cluster Dendrogram

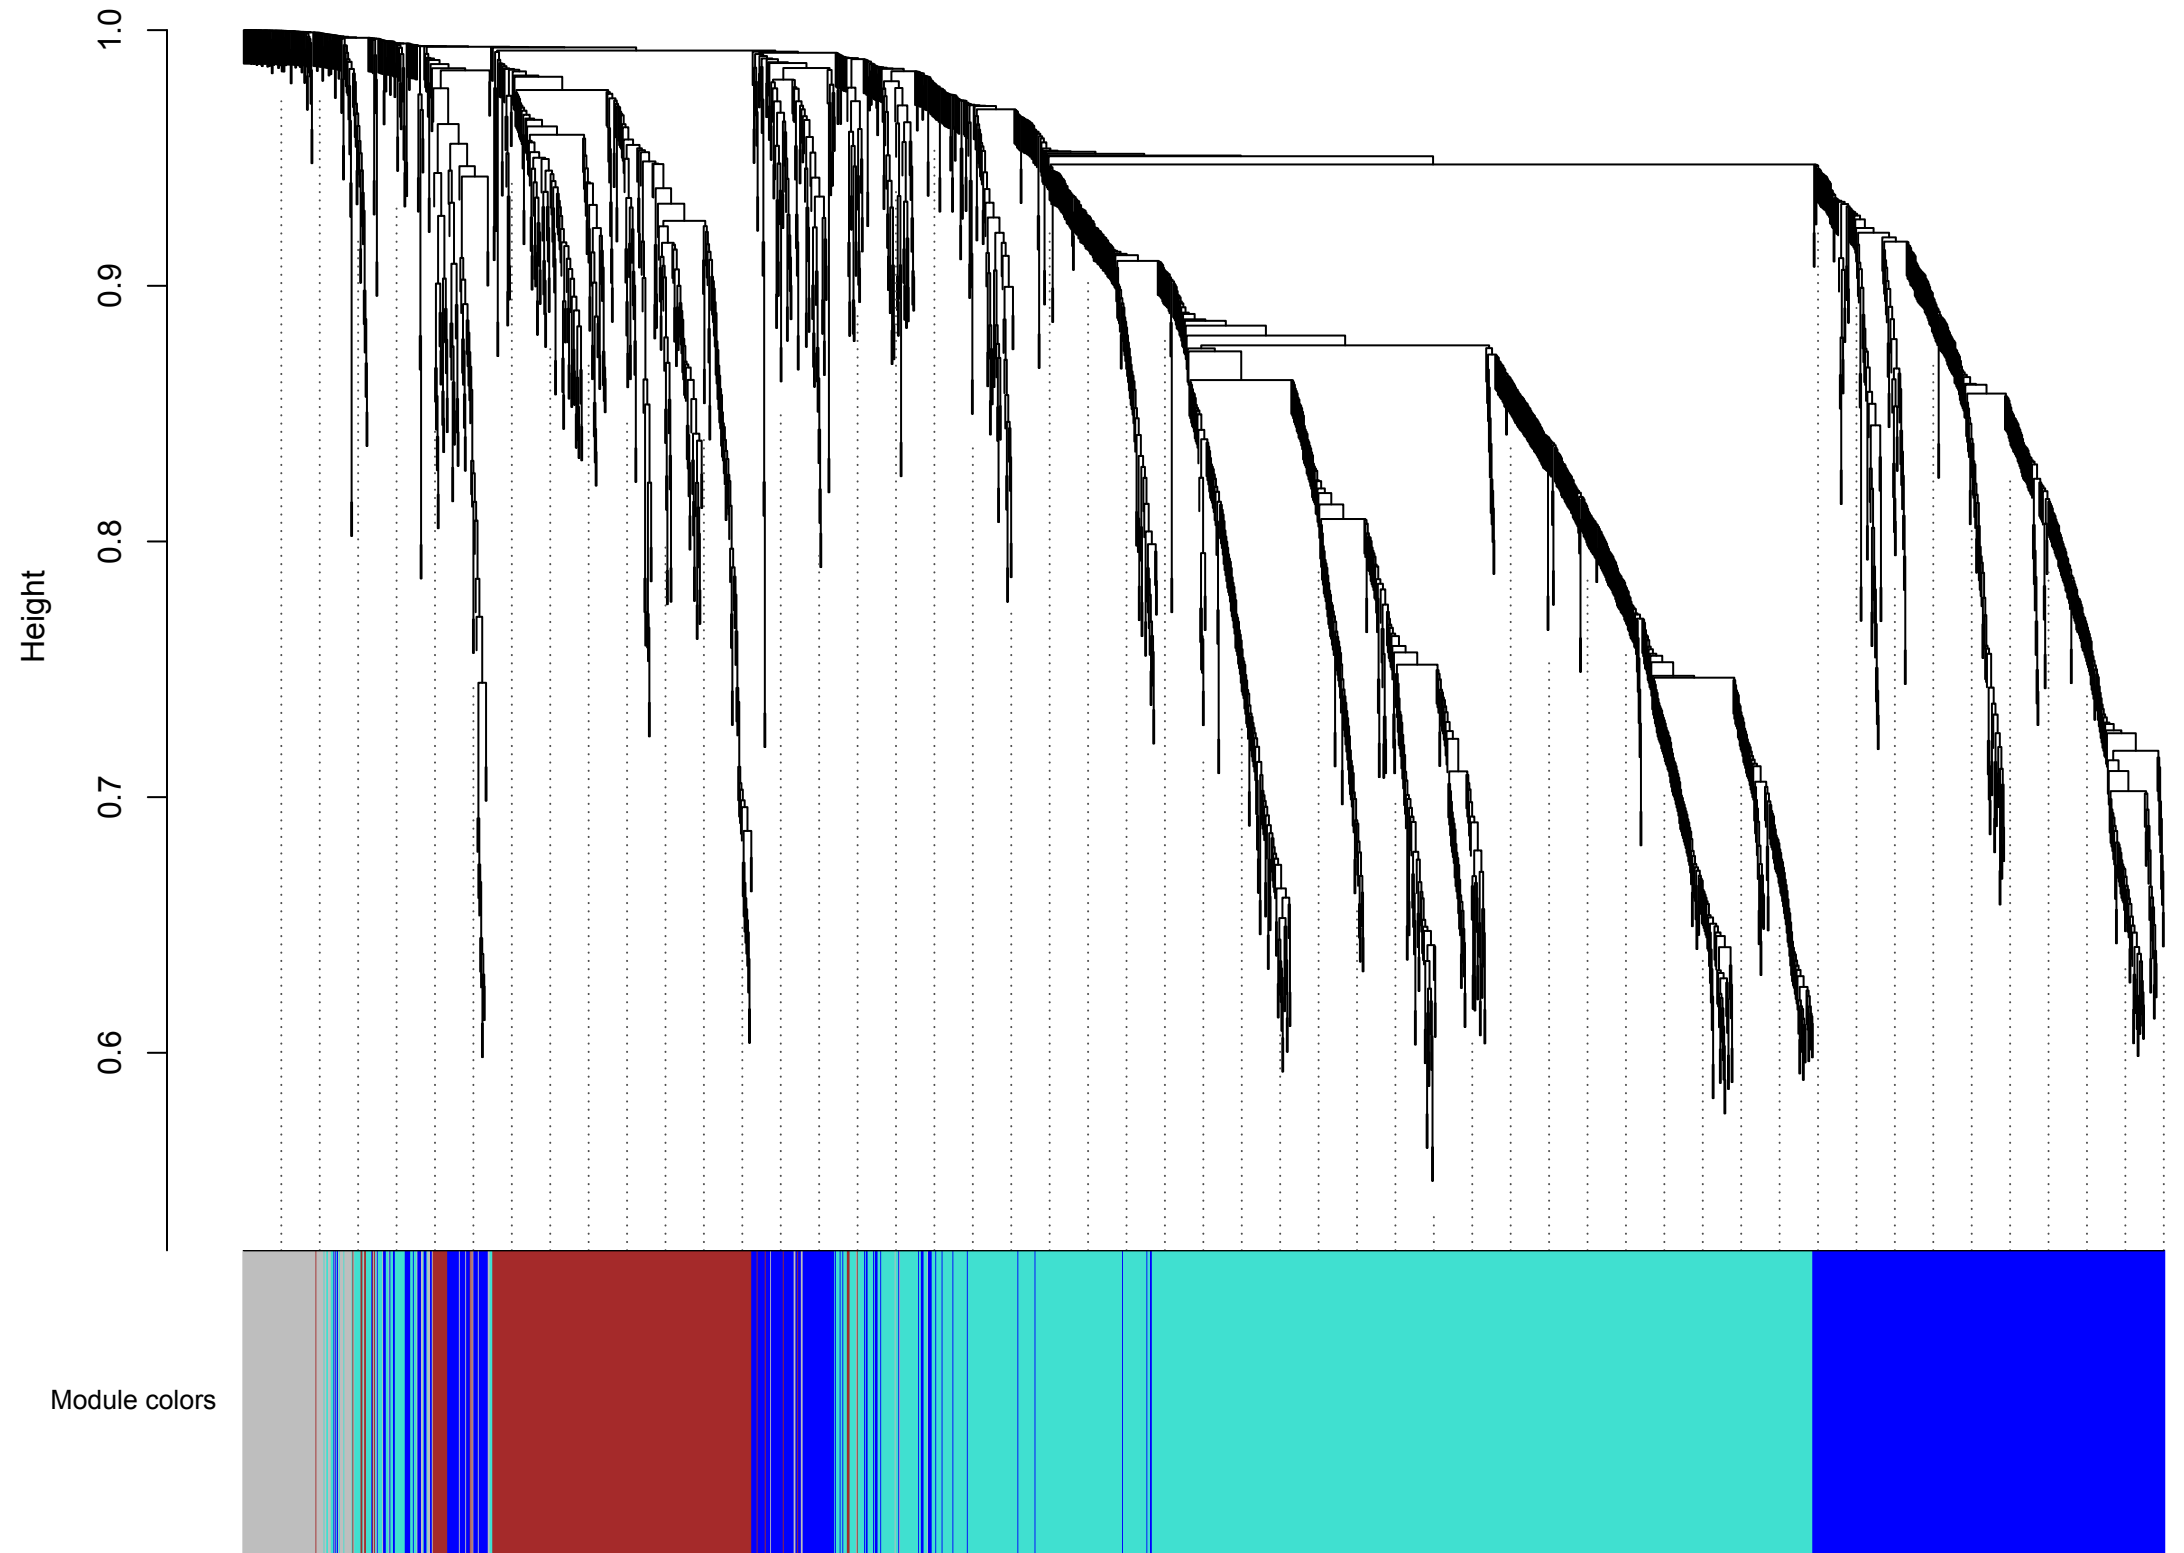

Supplement: s1 [file s1]
